# Supplementary material
Source: PubMed Central journal article supplement (PMC6760315)
Supplement: NIHMS1011886-supplement-1.pdf [file NIHMS1011886-supplement-1.pdf]

| Supplemental Table. Studies reporting post-printing viability using different cell types. |                                                                                            |                                                 |                                                                                                                                                                                                               |            |                                                 |                                         |
|-------------------------------------------------------------------------------------------|--------------------------------------------------------------------------------------------|-------------------------------------------------|---------------------------------------------------------------------------------------------------------------------------------------------------------------------------------------------------------------|------------|-------------------------------------------------|-----------------------------------------|
| Bioink                                                                                    | Type of Cells                                                                              | Purpose of Study                                | Outcomes                                                                                                                                                                                                      | Comparison | Assay(s)                                        | Reference                               |
| <b>Alginate + Cellulose</b>                                                               | Human nasal chondrocytes (hNCs), bone marrow-derived human mesenchymal stem cells (hBMSCs) | Cartilage engineering                           | After 60 days [post bioprinted construct implantation], formed tissue showed all qualitative features of proper cartilage and the formation of chondrocyte cell clusters was clear evidence of proliferation. | NO         | Fluorescent <i>in situ</i> hybridization (FISH) | (Möller et al., 2017)                   |
| <b>Alginate + Gelatin</b>                                                                 | Porcine aortic valve interstitial cells (VIC), Human aortic root smooth muscle cells (SMC) | Heart valve                                     | Both cell types were viable for (81.4 ± 3.4% for SMC and 83.2 ± 4.0) for VIC within 3D printed tissues after 7 days in culture.                                                                               | YES        | LIVE/DEAD; MTT cell viability                   | (Duan, Hockaday, Kang, & Butcher, 2013) |
| <b>Alginate + PCL</b>                                                                     | Human nasal septum chondrocytes, human osteoblasts (MG63)                                  | Osteochondral tissue engineering                | Chondrocytes (~93.9 ± 0.3%) and osteoblasts (~95.6 ± 1.8%) remained viable for at least 7 days, with no significant decrease in viability                                                                     | YES        | LIVE/DEAD                                       | (Shim, Lee, Kim, & Cho, 2012)           |
| <b>Collagen Hydrogel</b>                                                                  | Keratinocytes (KCs), fibroblasts (FB)                                                      | Skin engineering                                | Similar high viability post-printing was reported for keratinocytes and fibroblasts after 7 days in culture.                                                                                                  | YES        | Hoechst 33342/ Propidium iodide                 | (Lee et al., 2014)                      |
| <b>GelMA</b>                                                                              | Clone 8 cells (C3H/10T1/2 FBSTs), human neonatal dermal fibroblasts (HNFs), primary HUVECs | Vessel networks in tissue engineered constructs | Similar viability after one week in culture                                                                                                                                                                   | YES        | LIVE/DEAD                                       | (Kolesky et al., 2014)                  |
| <b>GelMA + Gelatin</b>                                                                    | Bone Marrow Stem Cells (BMSCs)                                                             | Direct Bioprinting of Soft Hydrogels            | Cell proliferation was more than 90% using a 5/8% (w/v) GelMA/gelatin cell-laden bioink. Provides a consistent alternative to printing with low viscosity (5%) GelMA.                                         | NO         | LIVE/DEAD                                       | (Yin et al., 2018)                      |

|                                             |                                                                                                                              |                                               |                                                                                                                                                                                                   |     |                                        |                                |
|---------------------------------------------|------------------------------------------------------------------------------------------------------------------------------|-----------------------------------------------|---------------------------------------------------------------------------------------------------------------------------------------------------------------------------------------------------|-----|----------------------------------------|--------------------------------|
| <b>GelMA + GMHA</b>                         | Human induced pluripotent stem cells (hiPSCs), Human umbilical vein endothelial cells (HUVECs), Mesenchymal supporting cells | Biomimetic liver                              | 76% viable cells within 2 h followed bioprinting. No significant change was observed within the first 3 days, whereas after a week, live cells accounted for 65% of the total population.         | NO  | LIVE/DEAD                              | (Ma et al., 2016)              |
| <b>GelMA + PEGTA + Alginate</b>             | HUVECs, Human mesenchymal stem cells (MSCs)                                                                                  | Vascular grafts                               | Percentages of viable cells within bioprinted constructs at UV exposures of 20 s and 30 s exceeded 80% after 1, 3, and 7 days of culture, significantly higher than those exposed to UV for 40 s. | NO  | LIVE/DEAD                              | (Jia et al., 2017)             |
| <b>GelMA Physical Gel (GPG)</b>             | HUVECs                                                                                                                       | Direct bioprinting of soft, porous constructs | A simple cooling technique enabled printing of low concentration (3%) GelMA to produce stable and soft structures after photocrosslinking that supported cell proliferation.                      | NO  | LIVE/DEAD                              | (Liu et al., 2017)             |
| <b>Matrigel</b>                             | Human ovarian cancer (OVCAR-5), control human fibroblasts (MRC-5)                                                            | <i>In vitro</i> 3D cancer model               | At 72 h post patterning, the co-culture of patterned cancer cells and fibroblasts did not show any dead cells, whereas the OVCAR5 and MRC-5 viabilities were 93.8% and 90.1% respectively.        | YES | LIVE/DEAD                              | (Manuscript & Magnitude, 2013) |
| <b>Matrigel</b>                             | Human alveolar epithelial type II (A549), hybrid HUVEC and A549 cells                                                        | <i>In vitro</i> air-blood barrier             | Printed epithelial cells showed higher viability than endothelial cells. Endothelial cells had 86% cell survival on the 3rd day of cultivation.                                                   | YES | Lactate dehydrogenase (LDH)            | (Horvath et al., 2015)         |
| <b>Cell Suspensions (No Bioink Carrier)</b> | Human fibroblasts, hADSCs, HPDLCs, ARPE-19, HUVECs, GES-1                                                                    | Printability of different human cell lines    | Five cell types demonstrated no significant difference in cell survival and proliferation before and after printing. Only hADSCs showed differences in the mean survival rates after printing.    | YES | LIVE/DEAD; Cell Counting Kit-8 (CCK-8) | (Xin et al., 2016)             |

- Duan, B., Hockaday, L. a, Kang, K. H., & Butcher, J. T. (2013). 3D Bioprinting of Heterogenous Aortic Valve Conduits with Alginate/Gelatin Hydrogels. *Journal of Biomedical Materials Research Part A*, 101(5), 1255–1264.
- Horvath, L., Umehara, Y., Jud, C., Blank, F., Petri-Fink, A., & Rothen-Rutishauser, B. (2015). Engineering an in vitro air-blood barrier by 3D bioprinting. *Scientific Reports*, 5.
- Jia, W., Gungor-ozkerim, P. S., Zhang, Y. S., Yue, K., Liu, W., Pi, Q., ... Khademhosseini, A. (2017). Direct 3D bioprinting of perfusable vascular constructs using a blend bioink, 58–68.
- Kolesky, D. B., Truby, R. L., Gladman, A. S., Busbee, T. A., Homan, K. A., & Lewis, J. A. (2014). 3D bioprinting of vascularized, heterogeneous cell-laden tissue constructs. *Advanced Materials*, 26(19), 3124–3130.
- Lee, V., Singh, G., Trasatti, J. P., Bjornsson, C., Xu, X., Tran, T. N., ... Karande, P. (2014). Design and Fabrication of Human Skin by Three-Dimensional Bioprinting. *Tissue Engineering Part C: Methods*, 20(6), 473–484.
- Ma, X., Qu, X., Zhu, W., Li, Y.-S., Yuan, S., Zhang, H., ... Chen, S. (2016). Deterministically patterned biomimetic human iPSC-derived hepatic model via rapid 3D bioprinting. *Proceedings of the National Academy of Sciences*, 113(8), 2206–2211.
- Manuscript, A., & Magnitude, S. (2013). NIH Public Access, 31(9), 1713–1723.
- Möller, T., Amoroso, M., Hägg, D., Brantsing, C., Rotter, N., Apelgren, P., ... Gatenholm, P. (2017). In Vivo Chondrogenesis in 3D Bioprinted Human Cell-laden Hydrogel Constructs. *Plastic and Reconstructive Surgery - Global Open*, 5(2), 1–7.
- Shim, J. H., Lee, J. S., Kim, J. Y., & Cho, D. W. (2012). Bioprinting of a mechanically enhanced three-dimensional dual cell-laden construct for osteochondral tissue engineering using a multi-head tissue/organ building system. *Journal of Micromechanics and Microengineering*, 22(8).
- Xin, Y., Chai, G., Zhang, T., Wang, X., Qu, M., Tan, A., ... Zhang, Y. (2016). Analysis of multiple types of human cells subsequent to bioprinting with electrospraying technology. *Biomedical Reports*, 5(6), 723–730.
